# Supplementary material for: Screen time and early adolescent mental health, academic, and social outcomes in 9- and 10- year old children: Utilizing the Adolescent Brain Cognitive Development ℠ (ABCD) Study
Source: PubMed Central journal article supplement (PMC8425530; doi:10.1371/journal.pone.0256591), 2021-09-08
Supplement: pone.0256591.s037.pdf [file pone.0256591.s037.pdf]

**Comments to Manuscript Number PONE-D-20-40267R2**

**Full Title: Screen time and early adolescent mental health, academic, and social outcomes in 9- and 10- year old children: Utilizing the Adolescent Brain Cognitive Development<sup>SM</sup> (ABCD) Study**

**Short Title: Screen time and the ABCD Study**

Thanks to the authors for their effort to address all the comments and implement the recommendations that were made during the second time review. I appreciate their work to make the manuscript reads better. I think this version now fits as a good one to publish in *PLoS ONE*. I believe the changes they have made significantly improved the quality of this paper.
